# Supplementary material for: Influence of electronic screen exposure on depression among women in early pregnancy: A cross-sectional study
Source: Research Square preprint supplement (doi:10.21203/rs.3.rs-1962504/v1), 2022-09-21
Supplement: Supplementary file 1 [file a169599cc47702a6fb51e77c.docx]

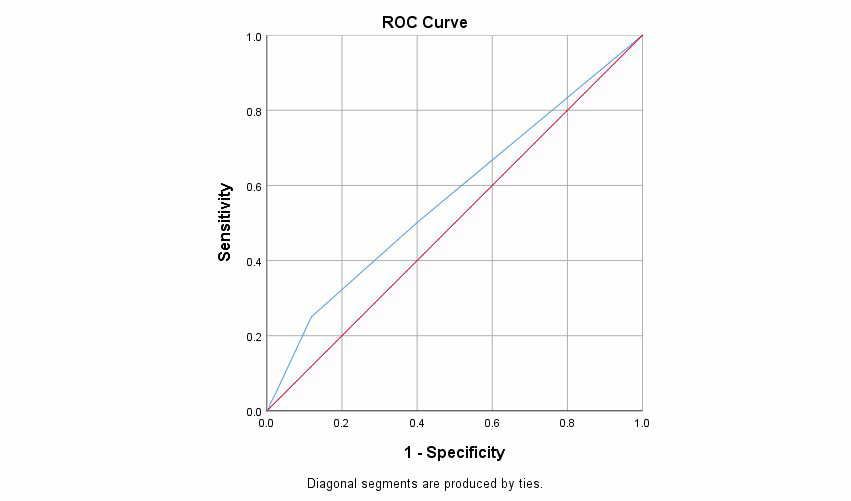


**Additional figure 1.** ROC curve of total daily smartphone viewing time.


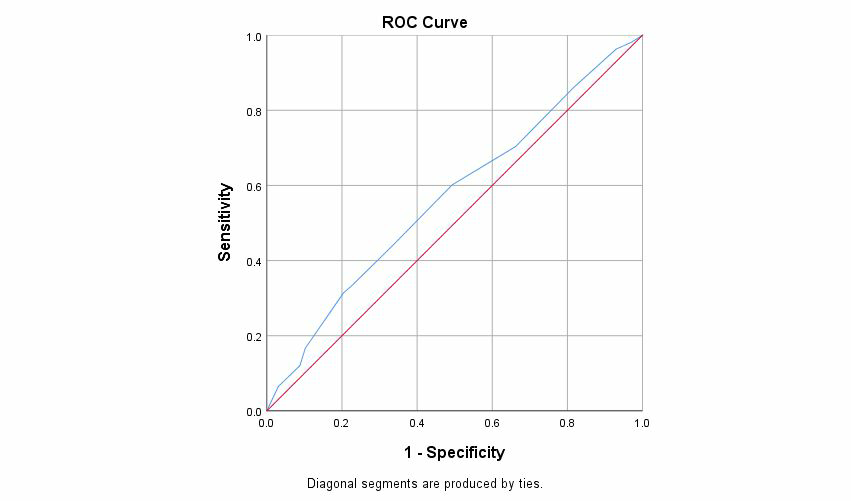


**Additional figure 2.** ROC curve of smartphone viewing time before nocturnal sleep.


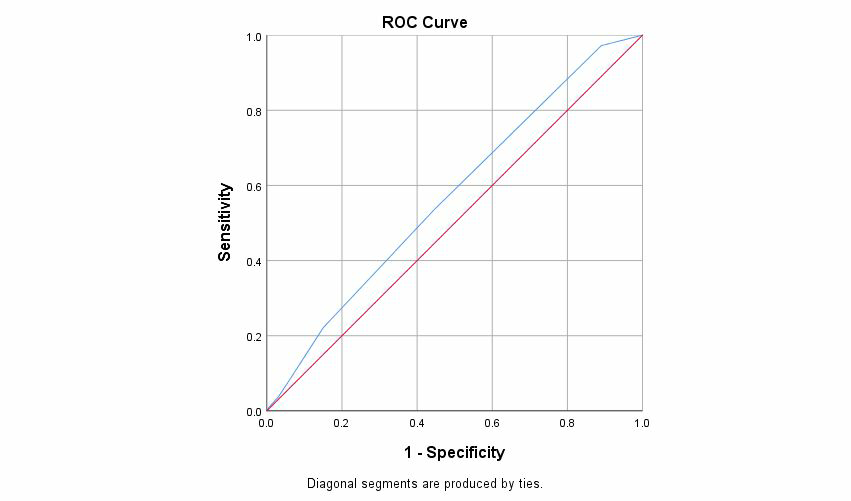


**Additional figure 3.** ROC curve of television viewing time before nocturnal sleep.
